# Supplementary material for: Graphene-coupled Ti3C2MXenes-derived TiO2mesostructure: promising sodium-ion capacitor anode with fast ion storage and long-term cycling
Source: Royal Society of Chemistry journal article supplement (doi:10.1039/c7ta09153b), 2017-12-12
Supplement: c7ta09153b1.pdf [file c7ta09153b1.pdf]

Supporting Information for *Journal of Materials Chemistry A*

# Graphene Coupled $\text{Ti}_3\text{C}_2$ MXenes-Derived $\text{TiO}_2$ Mesostructure: Promising Sodium-ion Capacitor Anode with Fast Ion Storage and Long-Term Cycling

Rutao Wang,<sup>a</sup> Shijie Wang,<sup>a</sup> Yabin Zhang,<sup>a</sup> Dongdong Jin,<sup>a</sup> Xinyong Tao,<sup>b</sup> Li

Zhang<sup>\*a</sup>

<sup>a</sup>Department of Mechanical and Automation Engineering, The Chinese University of Hong Kong, Shatin NT, Hong Kong SAR 999077, P. R. China.

<sup>b</sup>College of Materials Science and Engineering, Zhejiang University of Technology, Hangzhou 310014, P. R. China.

\*Email: lizhang@mae.cuhk.edu.hk

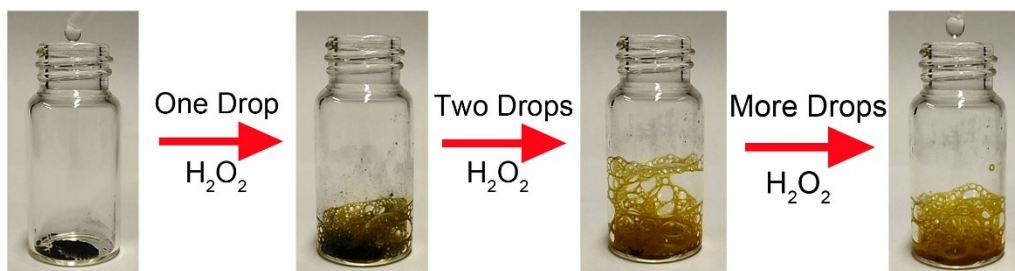

**Fig. S1** Optical images showing the violently oxidized process of MXenes- $\text{Ti}_3\text{C}_2$  with 30 wt%  $\text{H}_2\text{O}_2$ .

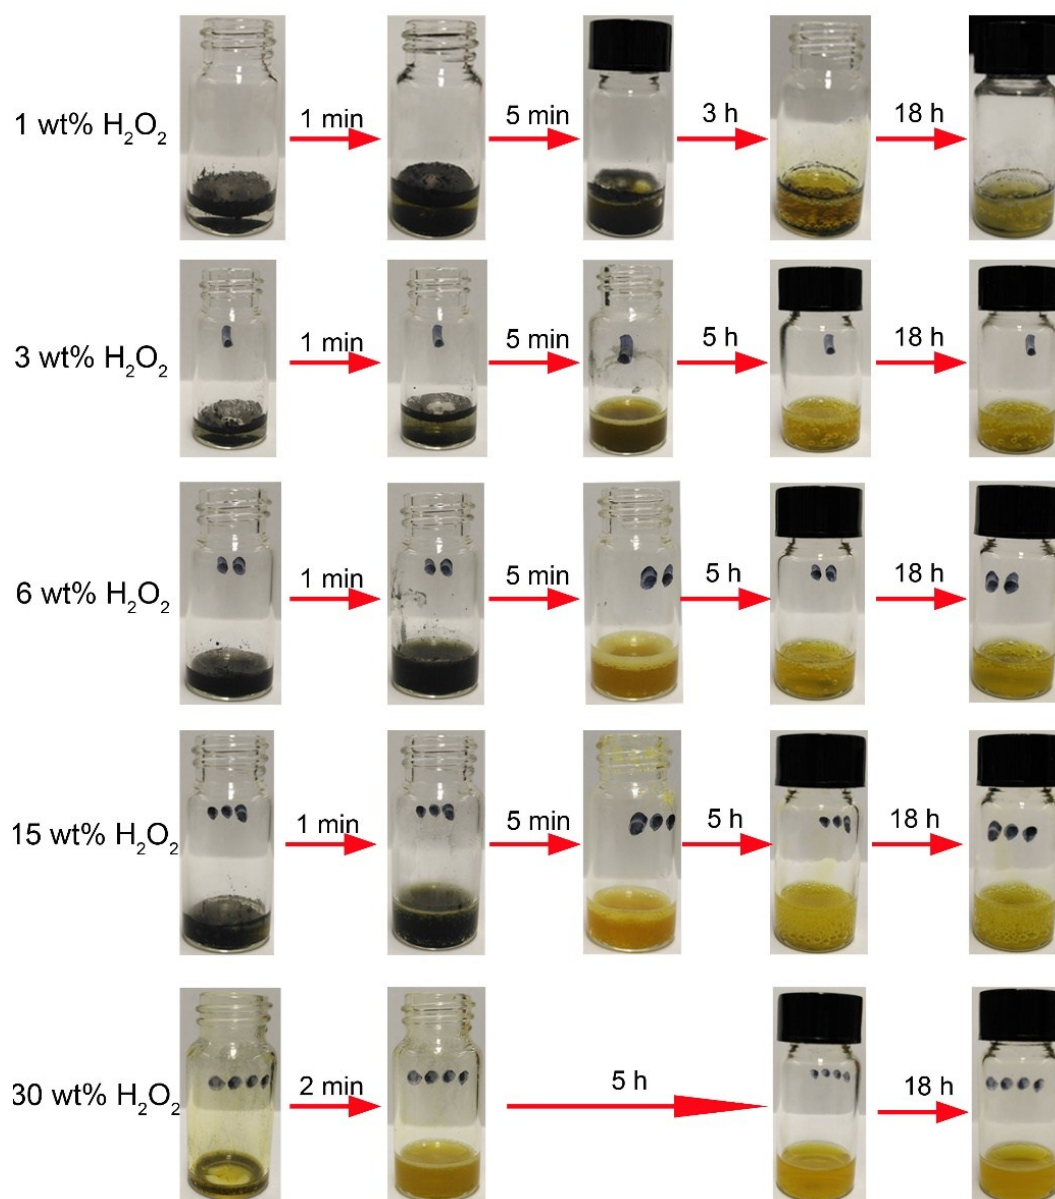

**Fig. S2** Optical images showing the reaction process of MXenes- $\text{Ti}_3\text{C}_2$  with  $\text{H}_2\text{O}_2$  with the different concentrations.

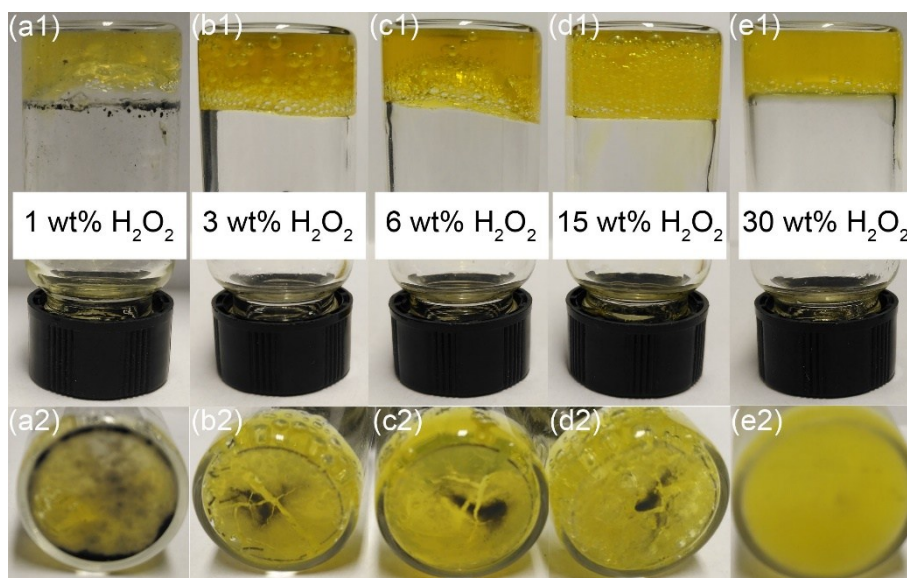

**Fig. S3** Optical images showing Ti-peroxo complex gels obtained by the oxidation of  $\text{H}_2\text{O}_2$  with different concentrations: (a1) and (a2)-1 wt%  $\text{H}_2\text{O}_2$ , (b1) and (b2)-3 wt%  $\text{H}_2\text{O}_2$ , (c1) and (c2)-6 wt%  $\text{H}_2\text{O}_2$ , (d1) and (d2)-15 wt%  $\text{H}_2\text{O}_2$ , (e1) and (e2)-30 wt%  $\text{H}_2\text{O}_2$ . All the gels in the glass bottles can be inverted. Some unreacted raw materials are observed at the bottom of the gels, as the dilute  $\text{H}_2\text{O}_2$  was used.

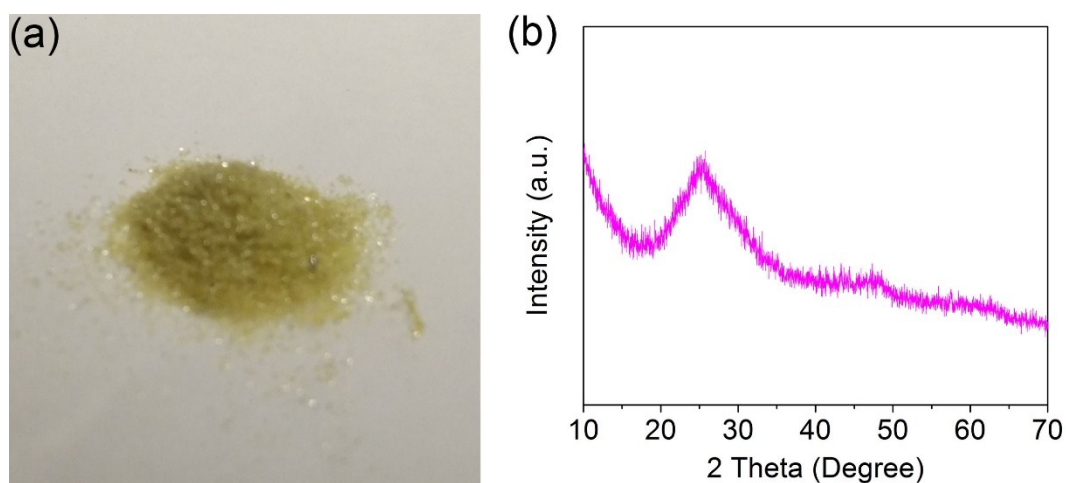

**Fig. S4** (a) Optical image and (b) XRD pattern of freeze-dried Ti-peroxo complex gel (from 30 wt%  $\text{H}_2\text{O}_2$ ).

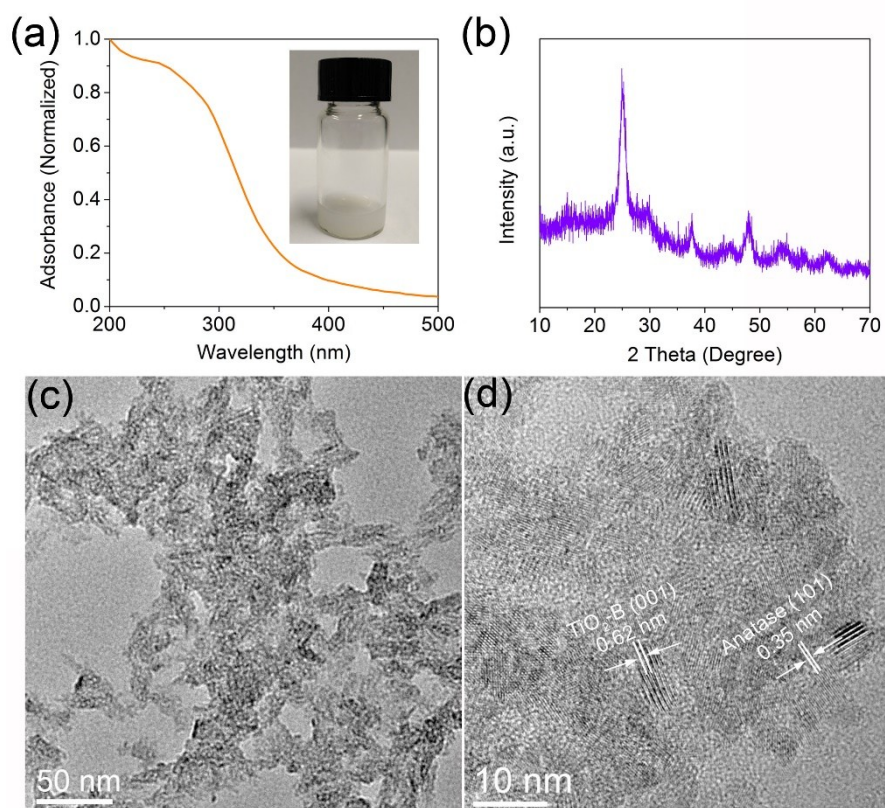

**Fig. S5** (a) UV-vis spectrum, (b) XRD pattern, (c) and (d) TEM images of Ti-peroxo complex after aged for two months.

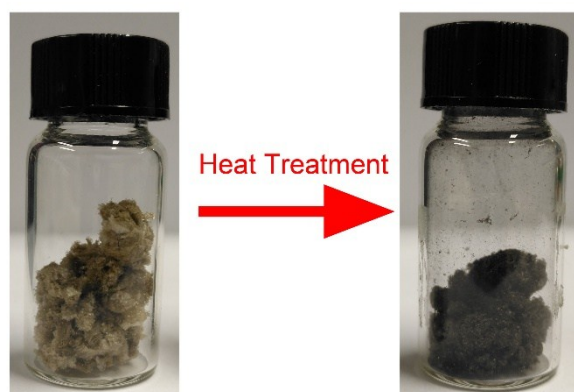

**Fig. S6** Optical images for (left) Ti-peroxo complex-GO and (right) M-TiO<sub>2</sub>-RGO samples.



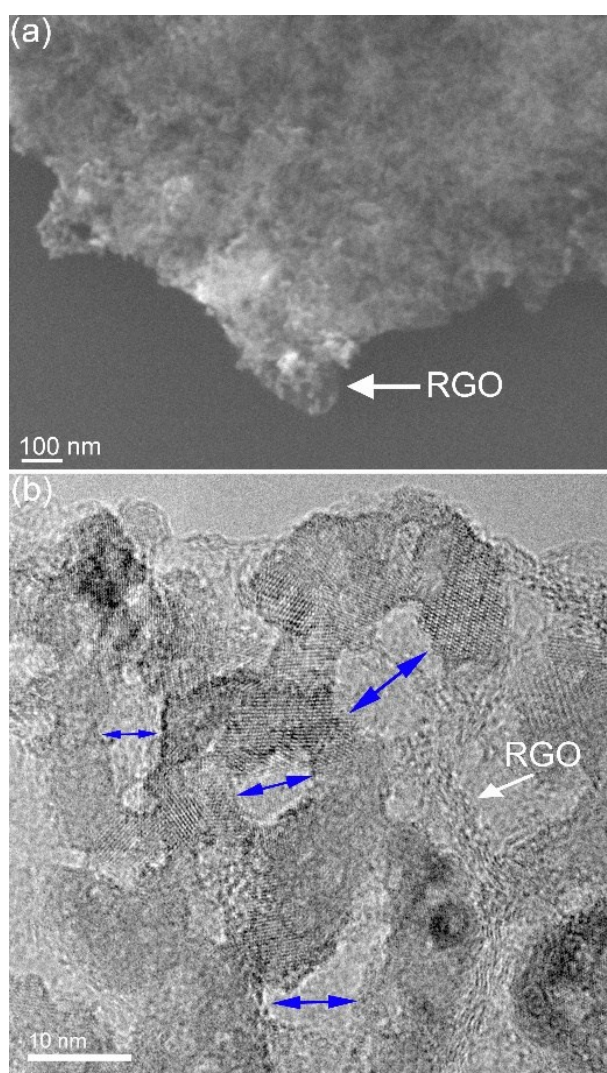

**Fig. S7** (a) SEM and (b) HRTEM image of M-TiO<sub>2</sub>-RGO. Blue arrows show mesoporous structure in M-TiO<sub>2</sub>-RGO.

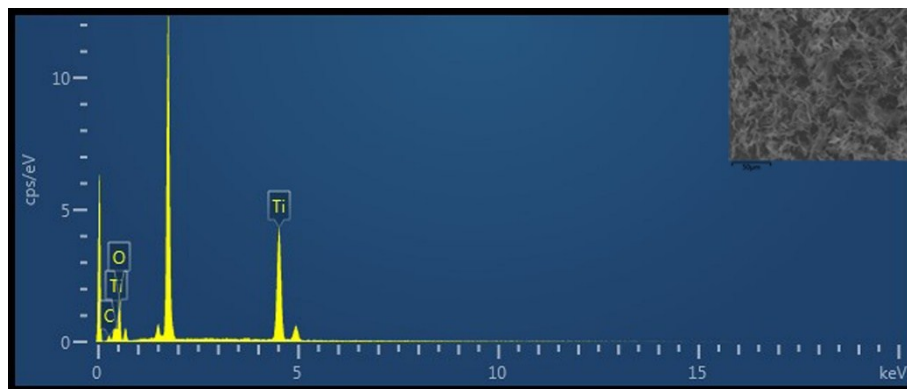

**Fig. S8** EDS spectrum of M-TiO<sub>2</sub>.

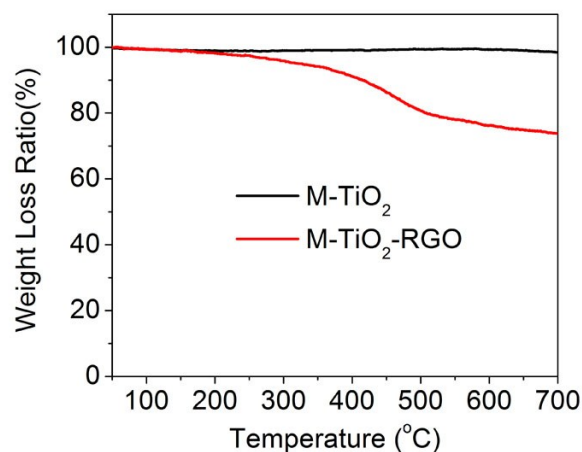

**Fig. S9** TGA curves of M-TiO<sub>2</sub> and M-TiO<sub>2</sub>-RGO samples in air with an elevated temperature rate of 10° min<sup>-1</sup>. The weight loss of M-TiO<sub>2</sub> might be related to the decomposition and oxidation of the residual carbon in air atmosphere. Assuming M-TiO<sub>2</sub> with and without RGO experiences the same weight loss, the content of M-TiO<sub>2</sub> in M-TiO<sub>2</sub>-RGO can be calculated as 73.7/98.4=74.9 wt%. The weight retention value here is obtained at 700 °C. As we know, RGO can be completely decomposed at 700 °C in air. Then the percentage of RGO in M-TiO<sub>2</sub>-RGO is (100-74.9) wt%=25.1 wt%.

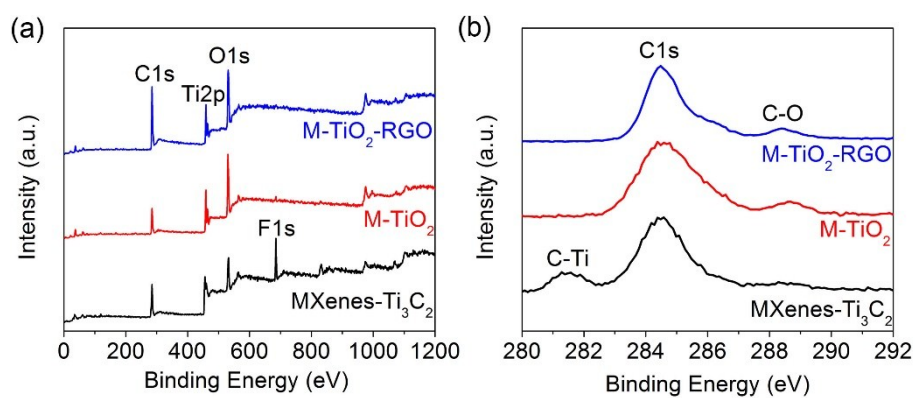

**Fig. S10** (a) Full and (b) C1s XPS spectrum of MXenes-Ti<sub>3</sub>C<sub>2</sub>, M-TiO<sub>2</sub>, and M-TiO<sub>2</sub>-RGO samples.

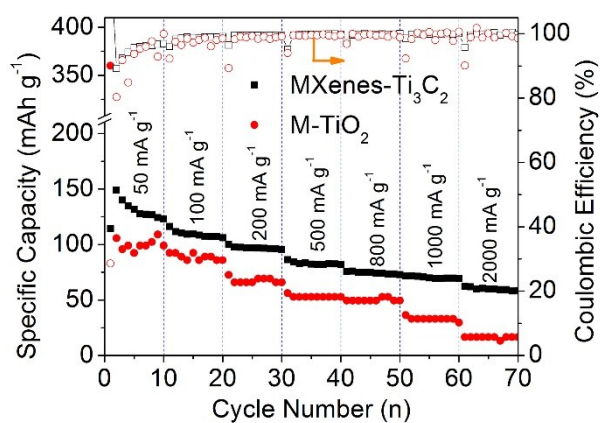

**Fig. S11** Rate capability of Ti<sub>3</sub>C<sub>2</sub> MXenes and M-TiO<sub>2</sub> at various current densities ranging from 50 to 2000 mA g<sup>-1</sup>.

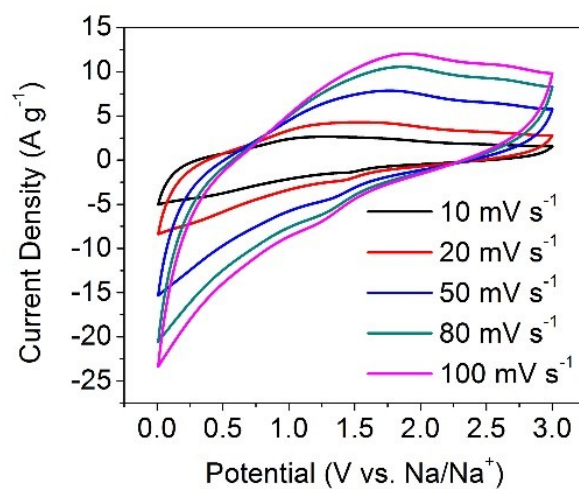

**Fig. S12** CV curves from 10 to 100 mV s<sup>-1</sup> of M-TiO<sub>2</sub>-RGO electrode.

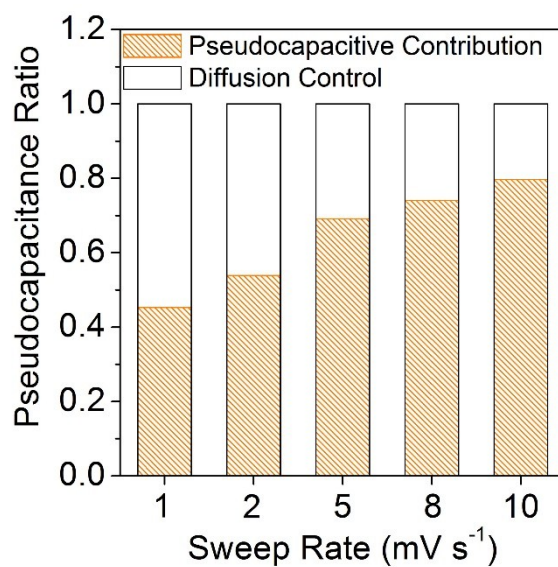

**Fig. S13** Contribution ratio of the capacitive and diffusion-controlled charge versus scan rate of M-TiO<sub>2</sub>-RGO electrode.



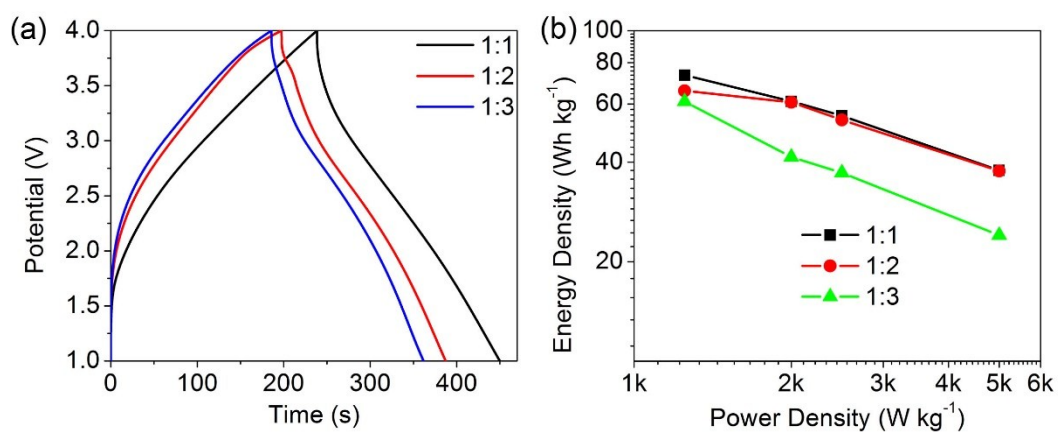

**Fig. S14** (a) Galvanostatic charge-discharge curves (current density of 0.5 A g<sup>-1</sup>) of M-TiO<sub>2</sub>-RGO//PDPC SIC measured at different anode/cathode mass ratios. (b) Ragone plot (power density vs. energy density) of this M-TiO<sub>2</sub>-RGO//PDPC SIC with different anode/cathode mass ratios.
